# Supplementary material for: Utilization of health care services before and after media attention about fatal side effects of the AstraZeneca vaccine: a nation-wide register-based event study
Source: bioRxiv or medRxiv preprint supplement (doi:10.1101/2021.07.09.21260250), 2021-10-25
Supplement: Supplementary file [file media-2.pdf]

## **Appendix B**

### ***Impact of AstraZeneca vaccination on health care use prior to the information shock***

To obtain one possible benchmark for gauging the magnitude of our main results, we estimated the impact of AstraZeneca vaccination on health care use prior to the information shock (Table A-B1). The sample consisted of HCW vaccinated prior to February 25<sup>th</sup> and their unvaccinated matches.

The impact of the information shock was greater than the isolated impact of vaccination on utilization of health care services. We found no significant increases in primary health care utilization the two weeks following AstraZeneca vaccination in the period prior to the information shock (Table A-B1). There was a slight increase in utilization of inpatient specialist care by 12 % in the first week and 24 % in the second week after vaccination (Table A-B1).

**Table A-B1:** Impact of AstraZeneca vaccination on health care utilization

| Period after vaccination | <b>Primary care</b> |         |                              |                          | <b>Inpatient specialist care</b> |         |                              |                          |
|--------------------------|---------------------|---------|------------------------------|--------------------------|----------------------------------|---------|------------------------------|--------------------------|
|                          | $\beta$             | St. err | % Relative diff. ( $\beta$ ) | Relative diff. (St. err) | $\beta$                          | St. err | % Relative diff. ( $\beta$ ) | Relative diff. (St. err) |
| First week               | 0.09                | 0.2     | 1                            | 2.6                      | 0.04                             | 0.038   | 12                           | 11.7                     |
| Second week              | -0.35*              | 0.205   | -5                           | 2.7                      | 0.08**                           | 0.04    | 24                           | 12.2                     |

*Notes:* Difference-in-difference estimates (in percentage points) for the change in the rate of persons utilizing different health care services per week after (hypothetical) vaccination, compared to utilization prior to vaccination. Time was treated as relative to the date of vaccination, unlike in the main analysis where time was treated as relative to March 11<sup>th</sup>. Each individual was followed for 28 days prior to and 14 days after date of vaccination. As we sought to estimate the isolated impact of vaccination on health care utilization prior to the information shock, we only included HCW vaccinated prior to February 25<sup>th</sup>. Hence, no individuals were observed after March 11<sup>th</sup>. All models controlled for calendar week (to handle seasonal effects), age, and sex. Standard errors (St. err. ) were clustered on individuals. The pre-period (4-1 weeks prior to (hypothetical) vaccination was reference period in all regressions. In addition to the presentation of results as absolute differences in percentage points, we also presented relative differences (i.e. in percent) by dividing the absolute estimate (and corresponding standard error) for each of the post periods by the health care use rate of the comparison group in the pre period (and multiplying with 100).

*Significance levels:* \* <0.1; \*\* <0.05; \*\*\* <0.01
